# Supplementary material for: Tuning the electrode work function via a vapor-phase deposited ultrathin polymer film
Source: Royal Society of Chemistry journal article supplement (doi:10.1039/c5tc03007b), 2015-12-15
Supplement: c5tc03007b1.pdf [file c5tc03007b1.pdf]

## Electronic Supplementary Information (ESI)

# Tuning the electrode work function via a vapor-phase deposited ultrathin polymer film

J. Baek,<sup>a†</sup> J. Lee,<sup>b†</sup> M. Joo,<sup>a</sup> D. Han,<sup>c</sup> H. Kim,<sup>b</sup> H. Seong,<sup>a</sup> J. Lee,<sup>b</sup> J. Kim,<sup>a</sup> S. Yoo,<sup>c,d</sup> S. Jeon<sup>b,d\*</sup> and S. G. Im<sup>a\*</sup>

*a. Department of Chemical and Biomolecular Engineering, Korea Advanced Institute of Science and Technology (KAIST), 291 Daehak-ro, Yuseong-gu, Daejeon, 305-701, Republic of Korea*

*b. Department of Materials Science and Engineering, KAIST*

*c. Department of Electrical Engineering, KAIST*

*d. Graphene Research Center in KI for Nano Century, KAIST*

*† These authors contributed equally to this work.*

Table of contents:

- 1. FTIR spectra of DMAMS monomer and PDMAMS**
- 2. The surface characteristics of PDMAMS with the variation of Deposition time (AFM, thickness change, and surface roughness)**
- 3. XPS spectra of PDMAMS-modified or unmodified Au surfaces**
- 4. WF change of the conducting materials calculated from UPS spectra**
- 5. TFT device characteristics with PDMAMS-modified Au and Cu S/D electrodes**
- 6. OM image of GTFT device and Dirac point shifts with the variation of PDMAMS deposition time or thermal annealing temperature**

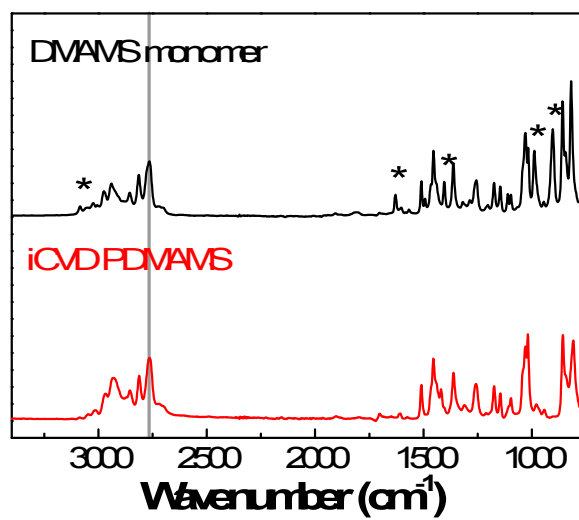

**Fig. S1** The FTIR spectra of DMAMS monomer (top, black) and PDMAMS (bottom, red).

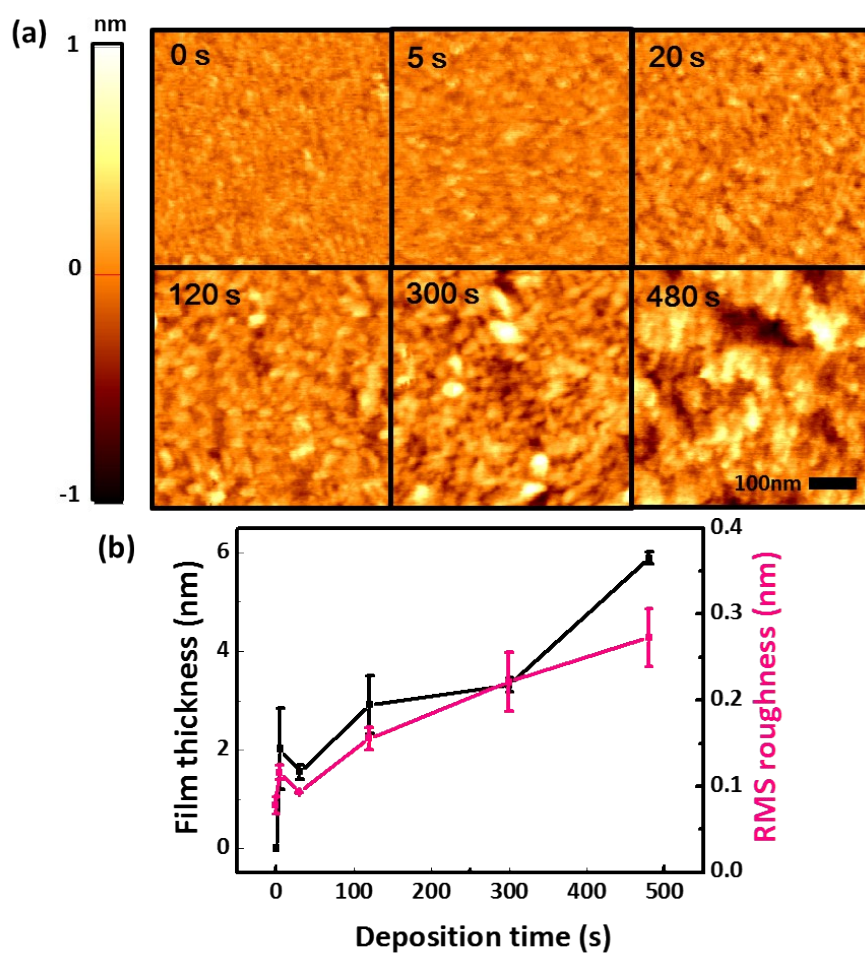

**Fig. S2** (a) The AFM images of PDMAMS on Si wafer with the various deposition time in iCVD chamber. (b) Changes of film thickness and RMS roughness of the polymer film on Si wafer with increasing deposition time.

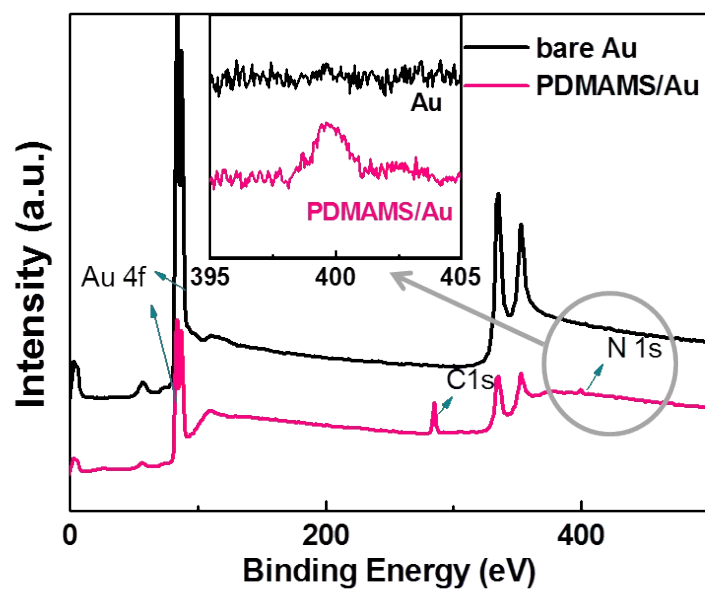

**Fig. S3** The survey scan of XPS spectra of bare Au (black) and PDMAMS (120 s)-modified Au surfaces (red), respectively. Inset shows the enlarged images of XPS scan near the N1s peak of bare Au and PDMAMS-modified Au surface.

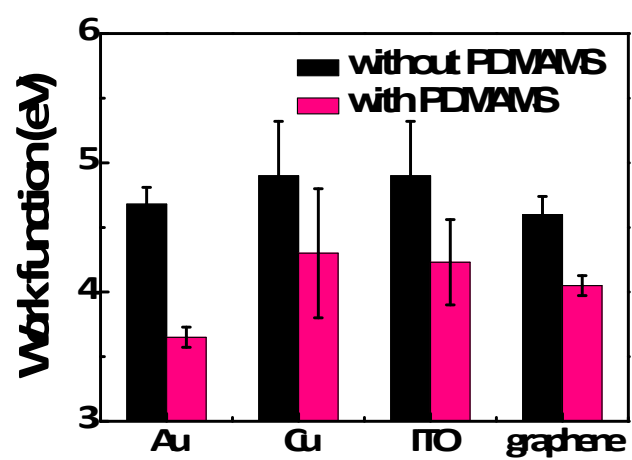

**Fig. S4** WF of the conducting materials with and without PDMAMS (30 s)-modification, calculated from UPS data.

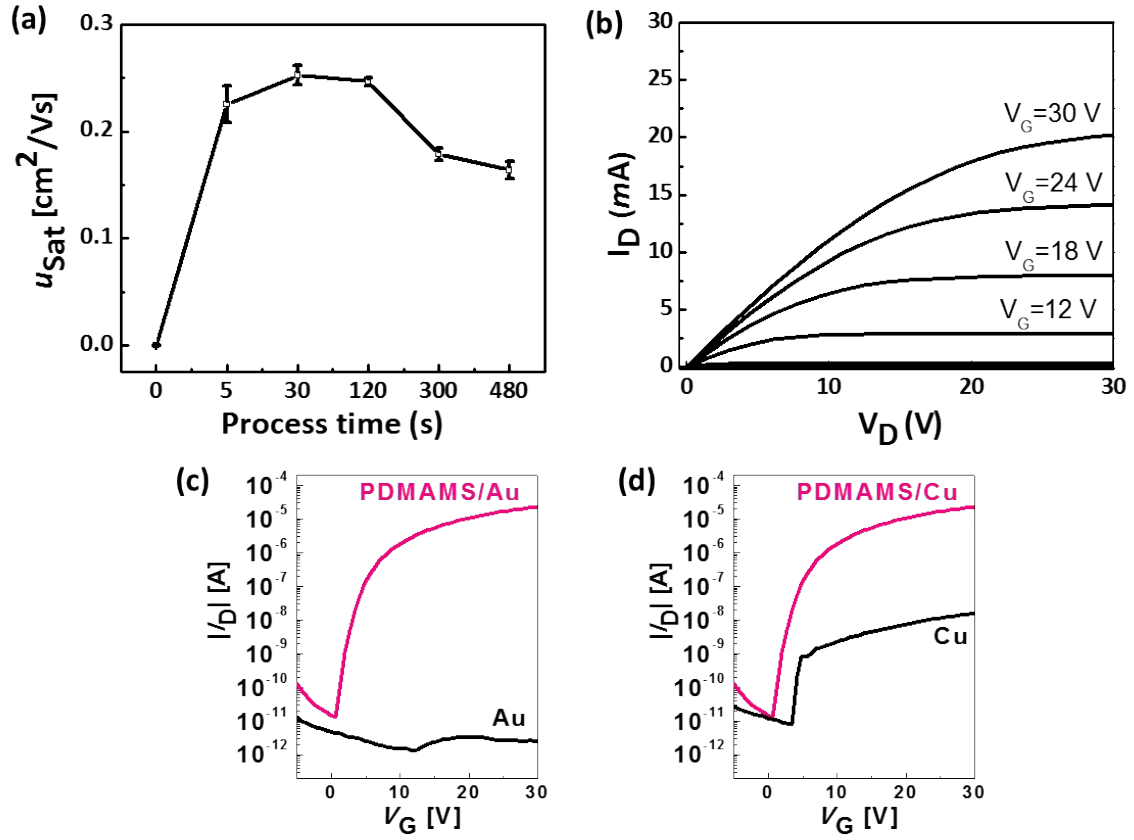

**Fig. S5** (a) The saturation mobility of bottom-contact  $C_{60}$  OTFTs with Au S/D electrode and bare  $\text{SiO}_2$  (100 nm) dielectric layer. The S/D electrode surfaces for each devices were PDMAMS-modified with five different deposition time intervals. (b) Output characteristic of the  $C_{60}$  TFT with Au S/D electrodes modified with ultrathin PDMAMS (30 s). (c) Transfer characteristics of OTFTs with (c) Au and (d) Cu S/D electrodes with and without PDMAMS interlayer.

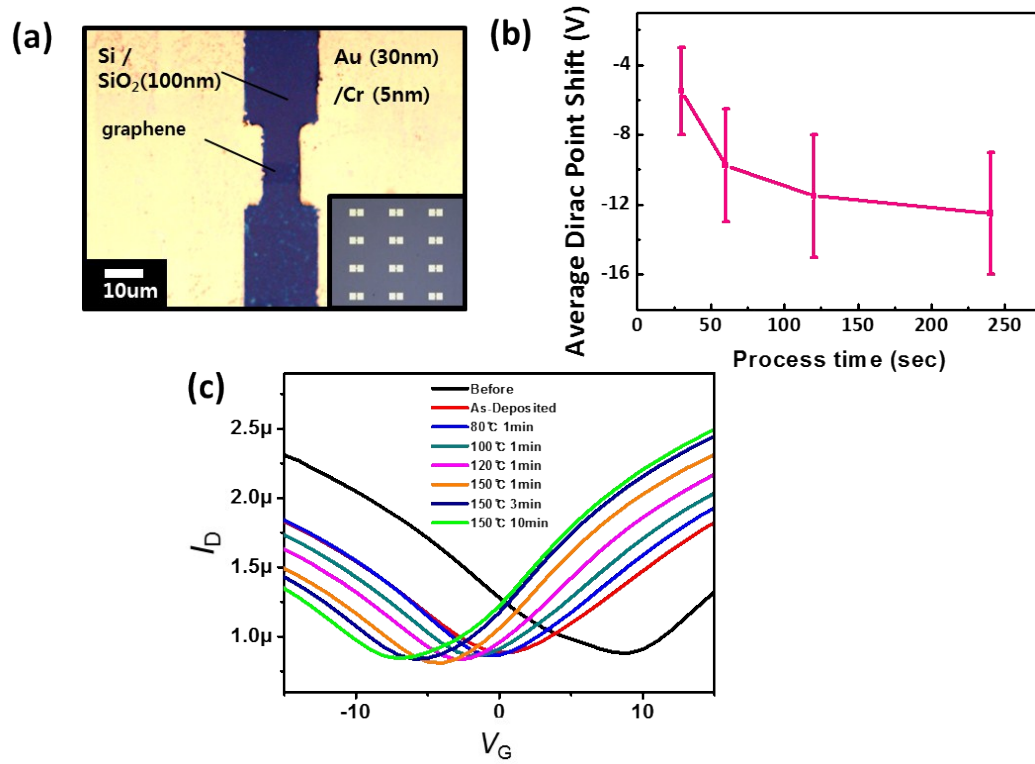

**Fig. S6** (a) An OM image of bottom-gate GTFT. Each channel length and width is differentiated from 2  $\mu\text{m}$  to 10  $\mu\text{m}$  (b) Average Dirac point shift with respect to the deposition time. (c) Transfer characteristics of PDMAMS (240 s)-modified GTFT with additional thermal annealing.
